# Supplementary material for: Cardiac sympathetic activation circumvents high-dose beta blocker therapy in part through release of neuropeptide Y
Source: JCI journal article supplement (doi:10.1172/jci.insight.135519), 2020-06-04
Supplement: sd1 [file 1]

## SUPPLEMENTAL FIGURES

### Supplemental Figure 1.

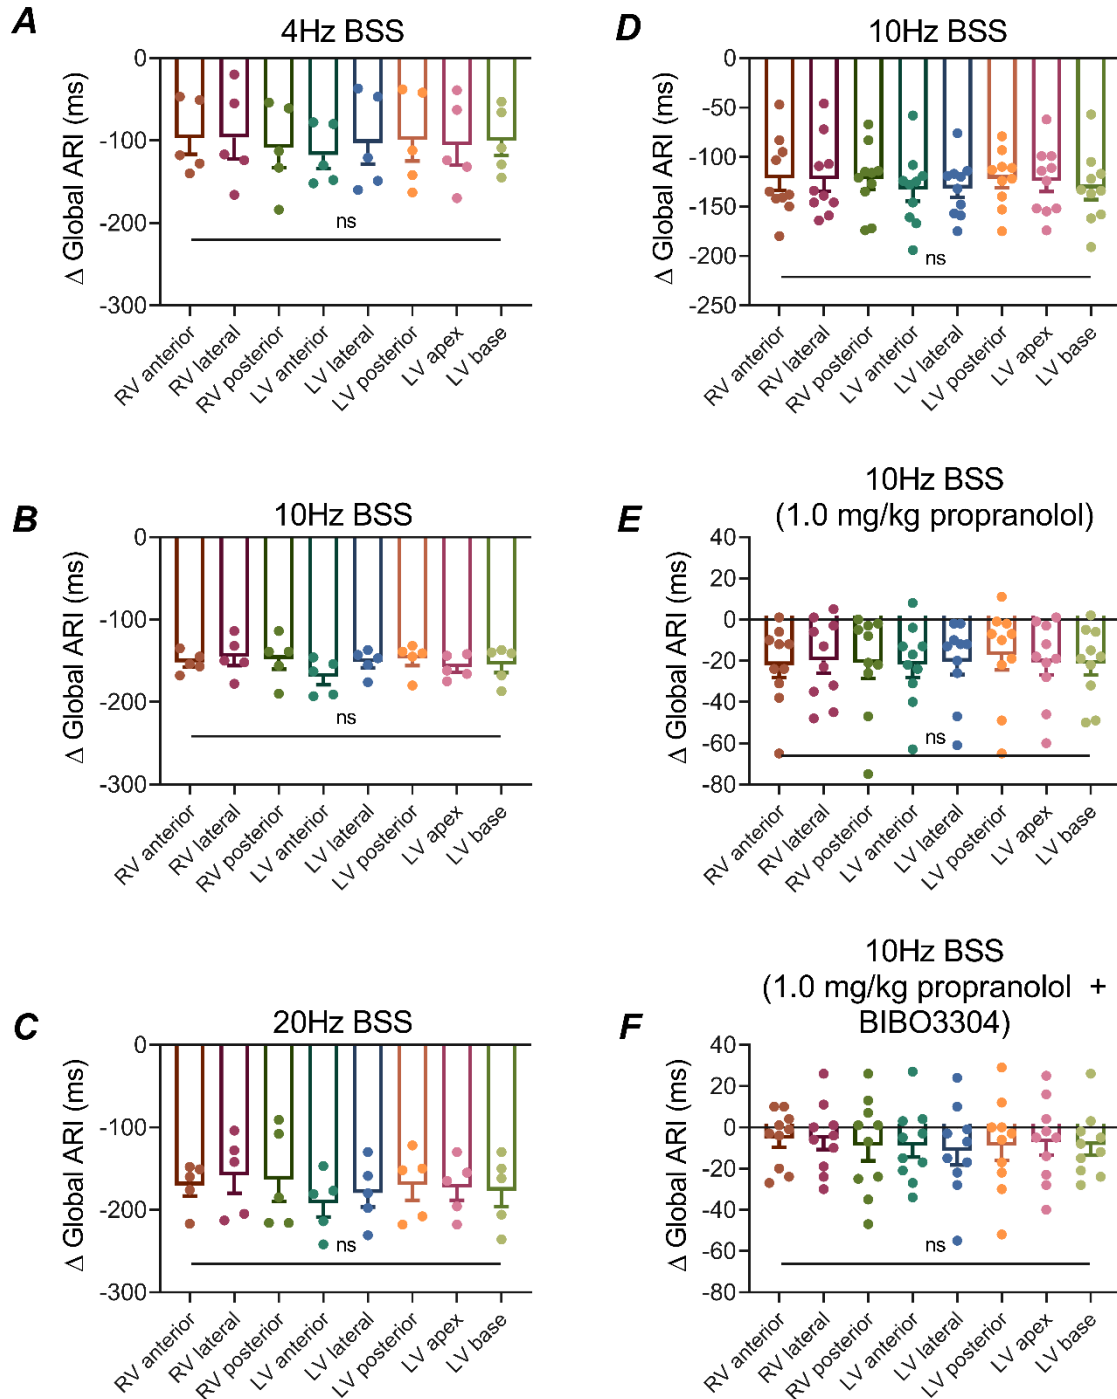

**Supplemental Figure 1.** Regional raw ARIs during BSS. There were no significant regional differences in the change in ARI between RV anterior, lateral, posterior

and LV anterior, lateral, posterior, apex and base with **(A)** 4 Hz, **(B)** 10 Hz, or **(C)** 20 Hz of stimulation or with 10 Hz stimulation **(D)** without drug, **(E)** with 1.0 mg/kg propranolol, or with **(F)** 1.0 mg/kg propranolol + BIBO3304. BL = baseline, BSS = bilateral stellate ganglia stimulation; RV = right ventricle, LV = left ventricle. **(A-C)** *n* = 5 animals for all comparisons, **(D-F)** *n* = 10 animals for all comparisons; comparisons of changes between different regions were performed using one-way ANOVA.

## Supplemental Figure 2.

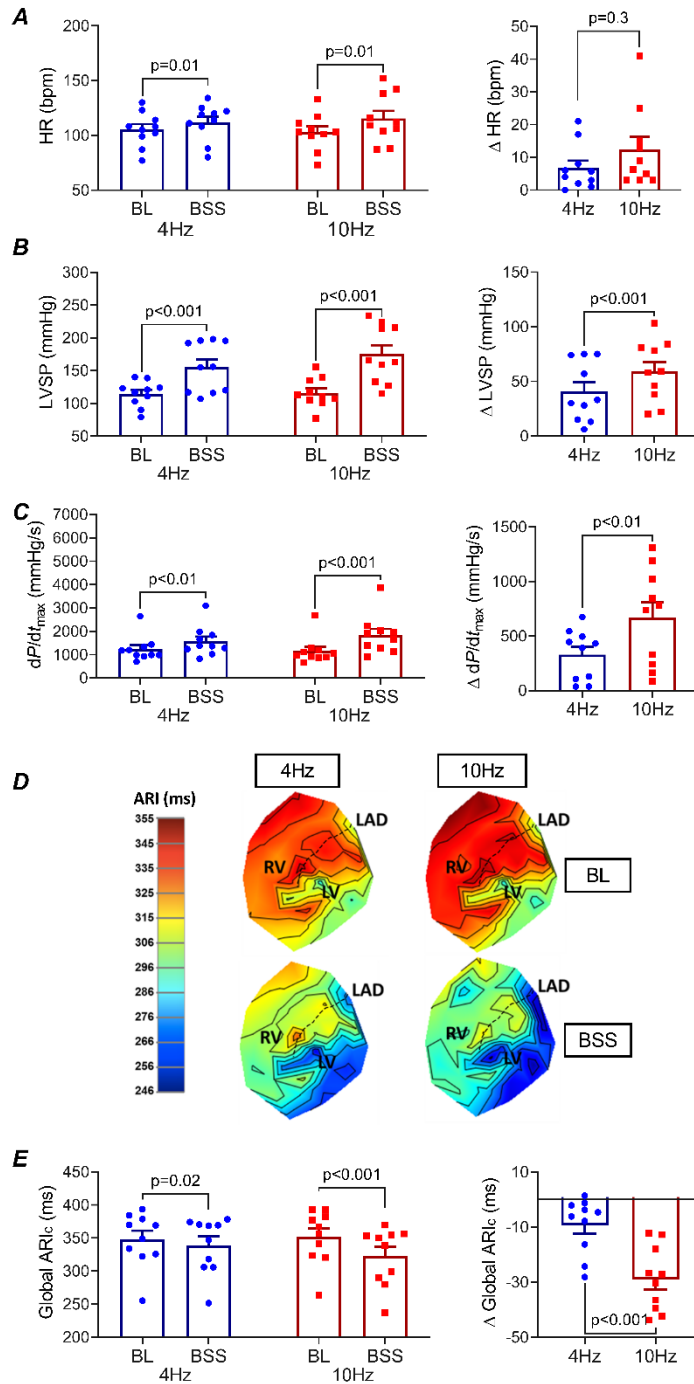

**Supplemental Figure 2.** Effects of BSS after 0.5 mg/kg propranolol. Both BSS at 4 Hz and 10 Hz significantly increased **(A)** HR, **(B)** LVSP, and **(C)**  $dP/dt_{max}$  despite administration of 0.5 mg/kg propranolol. BSS at 10 Hz caused significantly greater

increases in LVSP and  $dP/dt_{\max}$  vs. 4 Hz. BL = baseline. **(D)** Representative polar maps depicting the effects of BSS at 4 Hz and 10 Hz on raw ARIs after 0.5 mg/kg propranolol. **(E)** Both frequencies caused significant shortening in raw and corrected ARIs despite propranolol with greater effects at 10 Hz vs. 4 Hz. BL = baseline,  $\Delta$  = change from BL.  $n = 10$  animals for all comparisons, comparisons were performed using the two-sided paired Student's  $t$ -test.  $P \leq 0.05$  was considered significant.

**Supplemental Figure 3.**

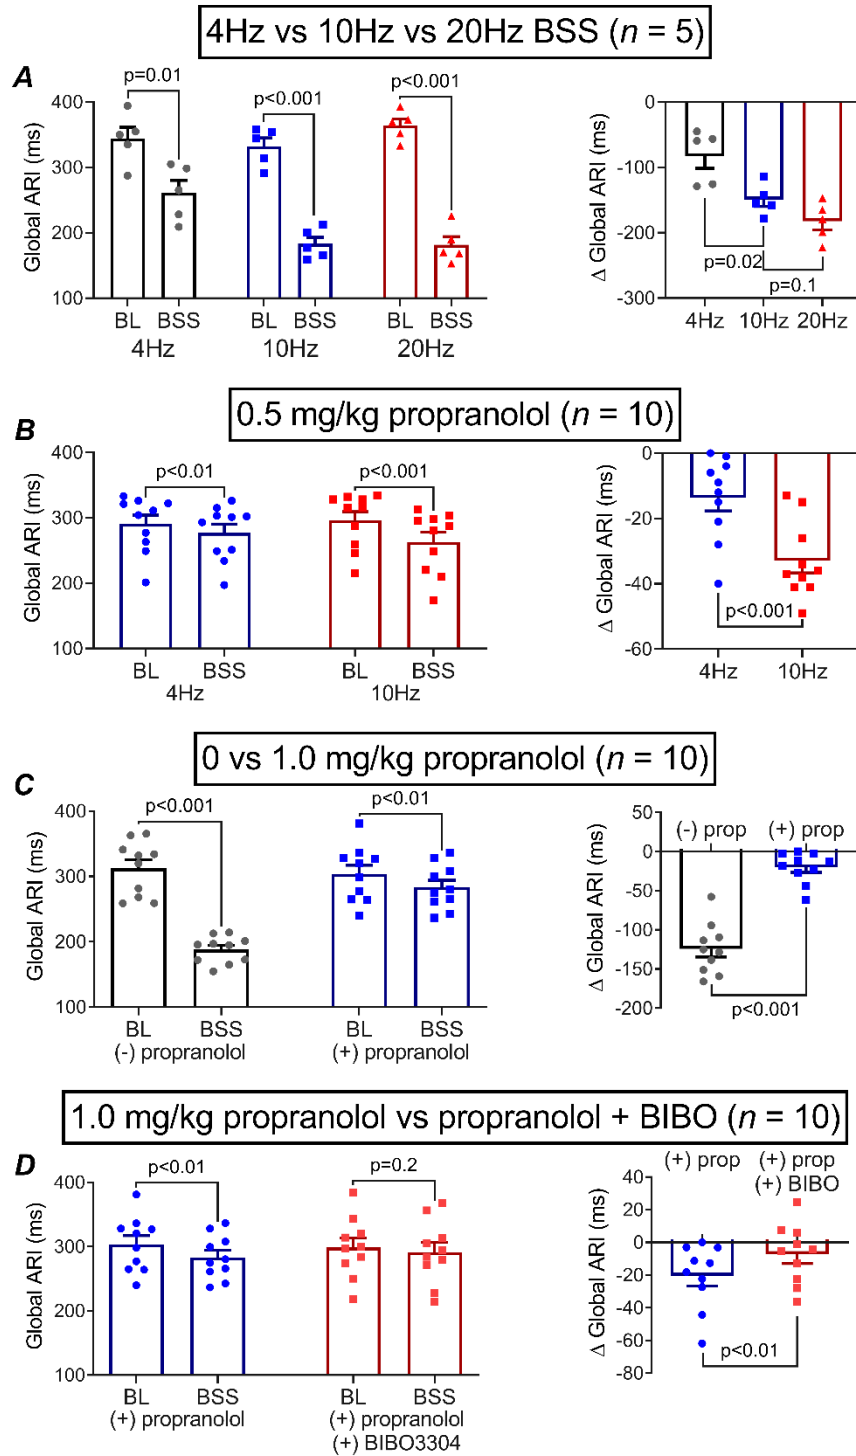

**Supplemental Figure 3.** *Uncorrected/raw global ventricular ARIs during each condition.* **(A)** Global ARI significantly shortened at all frequencies of stimulation with significantly more shortening at 10 and 20 Hz than 4 Hz BSS. **(B)** ARI shortening persisted at 4 and 10 Hz BSS despite treatment with 0.5 mg/kg propranolol with **(C)** residual electrophysiological effects in the setting of 1.0 mg/kg propranolol with 10 Hz BSS. **(D)** However, further administration of BIBO3304 abrogated the electrophysiological effects of 10 Hz BSS. Comparisons were performed using the two-sided paired Student's *t*-test.  $P \leq 0.05$  was considered significant.

**Full unedited blots for Figure 5.**

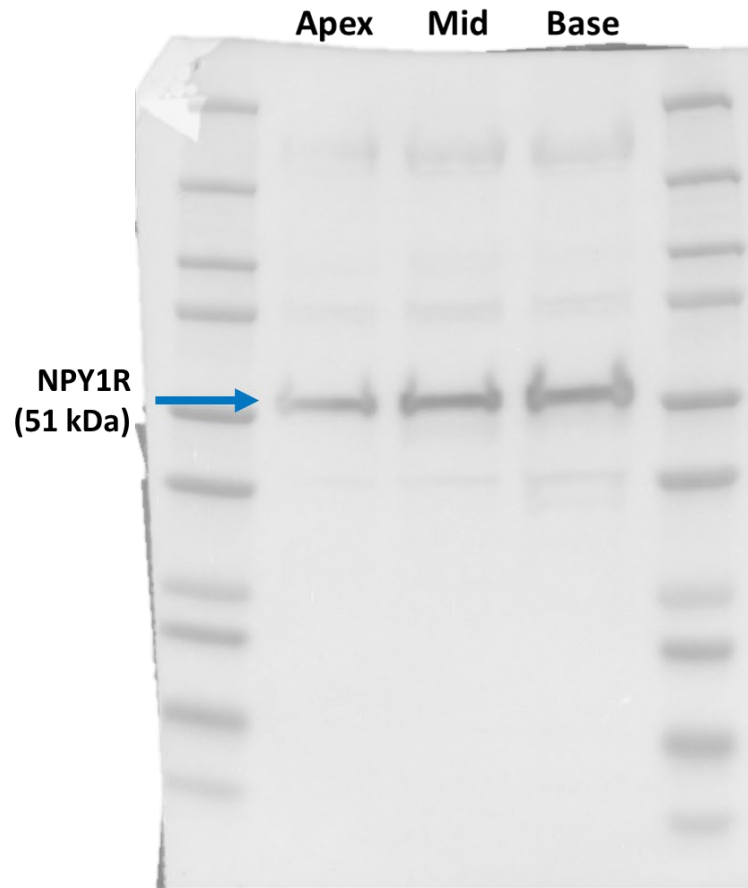

**Rb anti-NPY1R  
(1:1000; Abcam, ab91262)**

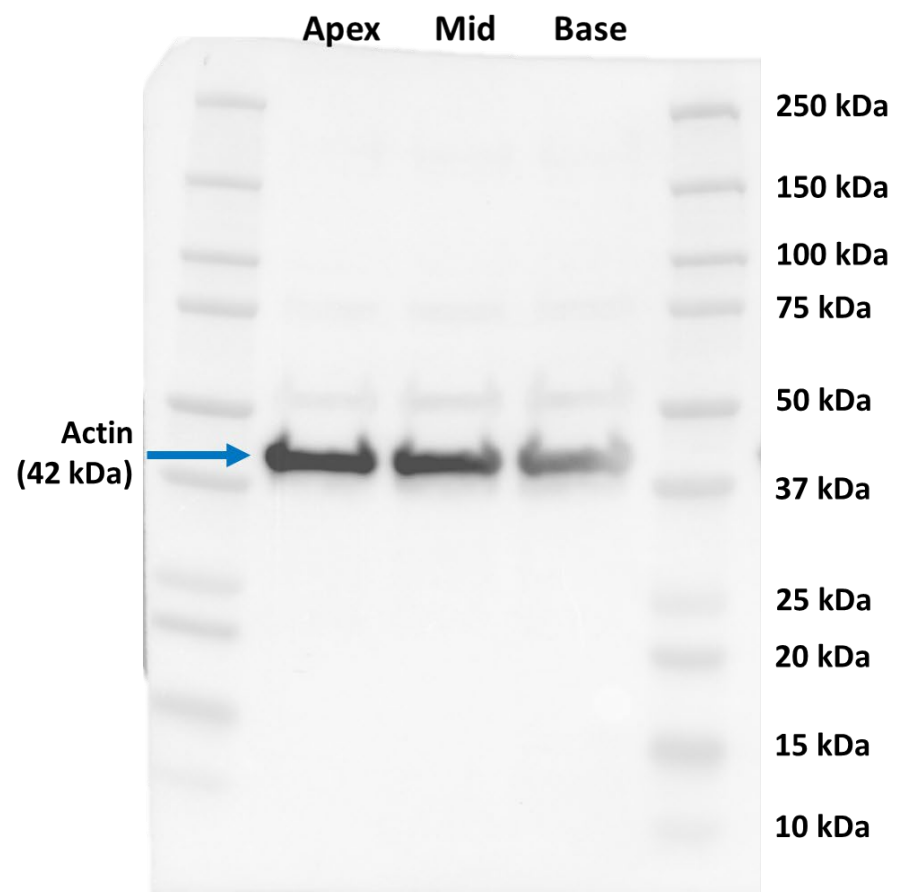

**Rb anti-actin  
(1:2500; Sigma, A2066)**
